1  
2  
3 **Role of somatostatin-positive cortical interneurons**  
4 **in the generation of sleep slow waves**  
5  
6

7 Chadd M. Funk<sup>1,2,3</sup>, Kayla Peelman<sup>1</sup>, Michele Bellesi<sup>1,4</sup>, William Marshall<sup>1</sup>, Chiara Cirelli,<sup>1\*#</sup> and Giulio Tononi<sup>1\*</sup>

8  
9 <sup>1</sup> Department of Psychiatry, University of Wisconsin-Madison, 6001 Research Park Blvd, Madison, WI 53719 USA

10 <sup>2</sup> Medical Scientist Training Program, University of Wisconsin-Madison, Health Sciences Learning Center, 750  
11 Highland Ave, Madison, WI 53705, USA

12 <sup>3</sup> Neuroscience Training Program, University of Wisconsin-Madison, 9531 WIMR II, 1111 Highland Ave, Madison,  
13 WI 53705 USA

14 <sup>4</sup> Department of Experimental and Clinical Medicine, Section of Neuroscience and Cell Biology, Università Politecnica  
15 delle Marche, Ancona, Italy

16  
17 \*, Corresponding authors

18 #, Lead contact  
19  
20

21 Running Title: SOM+ cells and sleep slow waves  
22  
23

24  
25 \* Correspondence:

26 Chiara Cirelli, MD PhD (lead contact)

27 Department of Psychiatry, University of Wisconsin - Madison

28 6001 Research Park Blvd

29 53719 Madison, Wisconsin, USA

30 ccirelli@wisc.edu  
31

32 or  
33

34 Giulio Tononi, MD PhD

35 Department of Psychiatry, University of Wisconsin - Madison

36 6001 Research Park Blvd

37 53719 Madison, Wisconsin, USA

38 gtononi@wisc.edu  
39  
40  
41  
42  
43

14 **SUMMARY**

15 Cortical slow waves – the hallmark of NREM sleep - reflect near-synchronous OFF periods in cortical neurons.  
16 However, the mechanisms triggering such OFF periods are unclear, as there is little evidence for somatic  
17 inhibition. We studied cortical inhibitory interneurons that express somatostatin (SOM), because ~70% of them  
18 are Martinotti cells that target diffusely layer 1 and can block excitatory transmission presynaptically, at  
19 glutamatergic terminals, and postsynaptically, at apical dendrites, without inhibiting the soma. In freely moving  
20 mice, we show that SOM+ cells can fire immediately before slow waves and their optogenetic stimulation  
21 triggers neuronal OFF periods during sleep. Next, we show that chemogenetic activation of SOM+ cells  
22 increases slow wave activity (SWA), the slope of individual slow waves, and the duration of NREM sleep;  
23 whereas their chemogenetic inhibition decreases SWA and slow wave incidence without changing time spent  
24 asleep. By contrast, activation of parvalbumin+ (PV+) cells, the most numerous population of cortical inhibitory  
25 neurons, greatly decreases SWA and cortical firing. These results indicate that SOM+ cells, but not PV+ cells,  
26 are involved in the generation of sleep slow waves. Whether Martinotti cells are solely responsible for this  
27 effect, or are complemented by other classes of inhibitory neurons, remains to be investigated.

28  
29 **Key words:** cerebral cortex, chemogenetics, NREM sleep, mouse, optogenetics  
30  
31  
32

## RESULTS AND DISCUSSION

Non-rapid eye movement (NREM) sleep is characterized by spindles and slow waves. While the mechanisms responsible for the generation of spindles are well characterized [1], those underlying slow waves remain unclear [2]. Slow waves are generated in the cerebral cortex even when isolated from thalamic input [1], although the thalamus is important for their full expression [3]. Every second or so in the course of NREM sleep, when the EEG records the occurrence of slow waves, cortical cells undergo a sharp hyperpolarization of the membrane potential lasting for tens to hundreds of msec (down state) during which neurons are silent (OFF period). This is followed by a return to a tonic depolarization (up state) often accompanied by neuronal firing (ON period). The near-synchronous occurrence of down states in large sectors of the cortex is detected in the EEG as the negative peak that typifies each slow wave. It was suggested that the OFF periods that characterize NREM sleep may occur, upon a background of increased potassium leak currents, through a passive “disfacilitation” associated with reduced synaptic input [1]. However, it is not clear what would trigger a decrease in synaptic input in the first place. Moreover, it is difficult to explain why the occurrence of the OFF periods is remarkably sharp and synchronous across large populations of neurons [4]. Finally, if reduced activity were the primary trigger of slow waves, it would be hard to explain why they can be induced reliably by electrical [5] or transcranial magnetic stimulation [6]. An alternative possibility is that down states may be induced by active inhibition [7, 8]. However, except for a small fraction of pyramidal neurons [7], intracellular recordings in the cell body of pyramidal cells are consistent with disfacilitation rather than with direct inhibition [1], and there is currently no causal evidence for the involvement of specific inhibitory cell types in the generation of slow waves.

We reasoned that a prominent class of cortical inhibitory interneurons that express somatostatin (SOM) – Martinotti cells – have several features that could explain the synchronous induction of OFF periods and associated slow waves in the absence of somatic inhibition. First, they are found throughout the cortex, where they target especially layer 1 (L1), the site of termination of many cortico-cortical connections, particularly back-connections, and of diffusely projecting thalamocortical projections from matrix cells [9, 10]. In L1, SOM+ cells powerfully inhibit excitatory transmission among pyramidal cells [11] through synaptic spillover over presynaptic GABA<sub>B</sub> receptors on glutamatergic terminals, which could explain the profound disfacilitation at the cell body despite little evidence for inhibitory currents [1]. Moreover, in L1 SOM+ cells inhibit distal dendrites of pyramidal cells [12] through GABA<sub>A</sub> [13] and likely GABA<sub>B</sub> receptors [14, 15]. Martinotti cells have high density of connections and convergence onto pyramidal cells, irrespective of specific subnetworks, and can thus provide indiscriminate pyramidal inhibition [16, 17]. Furthermore, SOM+ cells are activated by strong synchronous firing of pyramidal cells [18, 19] through progressively facilitating synapses [12, 20]. When

many SOM+ cells are activated together, they act as ‘master regulators,’ inhibiting all other cell types but themselves [21], in line with the observations that OFF periods are found across cell types [1]. SOM+ cells tend to fire more strongly late during the up state, and have been implicated in the termination of the up state in computer simulations [22] and in vitro [20], possibly by activating GABA<sub>B</sub> receptors [14, 23]. Finally, Martinotti cells have uniquely broad and complex axonal arborizations [23], which could account for the broad synchrony of sleep slow waves [1], and they form an electrical syncytium through gap junctions [19, 24], which could favor the spread of slow waves in cortex and possibly account for their traveling nature [25].

There is currently no molecular marker to target Martinotti cells exclusively [26]. Instead, we used SOM-Cre mice [27], because Martinotti cells form the bulk (~70%) of SOM-expressing cells in cortex [21]. Adeno-associated virus (AAV)-driven expression of Cre-dependent enhanced green fluorescent protein (eGFP) in SOM-Cre mice confirmed that SOM+ cells have strong projections to L1 both locally and up to several millimeters away from the injection site (Suppl. Figure S1A), consistent with the known projections of Martinotti interneurons [23]. We then injected SOM-Cre mice either in one frontal site (secondary motor cortex, M2) with Cre-inducible AAV expressing channelrhodopsin-2 (ChR2), or bilaterally in frontal (M2) and parietal cortex with Cre-inducible AAV expressing the designer receptors hM3Dq or hM4Di. After ~3 weeks to allow for viral expression, mice were implanted with frontal and parietal EEG electrodes and intracortical laminar probes in M2, and continuously recorded for several days across multiple sleep-wake cycles, during sleep deprivation and subsequent recovery sleep, as well as during and after optogenetic or chemogenetic stimulation (Suppl. Figure S1B).

First, we characterized the firing pattern of 3 SOM+ cells in M2 that were identified by optogenetic tagging in freely moving animals (Figure 1A) and whose activity could be followed for several days during the sleep-wake cycle (Figure 1B). All 3 cells exhibited state-specific firing modulation, with higher firing levels during active wake with exploration relative to quiet wake (consistent with [28], but see [29]) and during NREM sleep relative to REM sleep (Figure 1C). Two of these cells were also recorded during recovery sleep after sleep deprivation, when they fired more than during baseline sleep (Figure 1D). In these cells firing was negatively correlated with spindle activity (Suppl. Figure S2A) and positively correlated with SWA, both in baseline and after sleep deprivation (Figure 1E). In all 3 cells firing significantly increased between 50 and 100 ms before the onset of locally detected slow waves, consistent with a link between SOM+ cell firing and SWA in natural sleep (Figure 1F). Although correlative and restricted to a few neurons, these results are consistent with the hypothesis that SOM+ cell firing may be linked to the occurrence of slow waves in natural sleep.

25 To directly test whether SOM+ cell firing is sufficient to induce OFF periods in the local cortical network of  
26 freely moving animals, we used optogenetic stimulation to briefly activate SOM+ cells in M2 during natural  
27 sleep, while recording multi-unit activity (MUA) and single unit activity from the same area. SOM+ cell  
28 activation with laser pulses (50 msec) consistently induced OFF periods in MUA that outlasted the duration of  
29 the pulse and were comparable in length to those occurring during stimulation-free sleep ( $190 \pm 32$  ms vs.  $174$   
30  $\text{ms} \pm 10$  ms; mean  $\pm$  sd). OFF periods occurred in all recorded M2 channels, including a majority whose MUA  
31 decreased during the pulse and remained decreased in the subsequent OFF period, and a few channels whose  
32 MUA sharply increased during the pulse. These “responding” channels, which presumably contained at least  
33 one SOM+ cell, accounted for  $\sim 7\%$  of all channels, consistent with the number of cortical cells that are SOM+  
34 [30] (SOM+ channel, Figure 1G). After spike sorting 72 single units were identified across all channels in  
35 superficial and deep layers, including 63 broad (putative excitatory) units, and 9 narrow (putative inhibitory)  
36 fast-spiking neurons. All units were effectively silenced by SOM+ cell activation, in line with the ability of  
37 SOM+ cells to inhibit all other cortical cell types [21] (Figure 1H,I). Diffuse and persistent silencing was also  
38 obtained with shorter (20 msec) laser pulses (data not shown). Thus, multiunit OFF periods induced by SOM+  
39 cell activation appear similar to those of physiological NREM sleep and crucially, brief optogenetic activation  
40 of SOM+ cells silences all recorded single units for a period that outlasts the stimulation – a characteristic  
41 feature of the bistability of slow oscillations [31].

42 Next, we tested whether selective chemogenetic activation of SOM+ interneurons over a large portion of  
43 cortex (bilateral frontal + parietal) would promote a prolonged increase in SWA. We chose a chemogenetic  
44 approach because it allows for sustained depolarization of SOM+ cells without enforcing highly synchronous  
45 activation as in optogenetic experiments. To control for its possible sedative effects, the selective ligand  
46 clozapine-N-oxide (CNO) was injected in SOM+ mice expressing the excitatory receptor hM3Dq AAV, and in  
47 other mice expressing non-hM3Dq AAV (controls). The effects of SOM+ cell chemogenetic activation on  
48 behavioral state and spectral activity in specific frequency bands were assessed using linear mixed effect (LME)  
49 models that included mouse as a random effect, as well as day (baseline, CNO), condition (group, e.g. hM3Dq,  
50 non-hM3Dq), and time (hour) as categorical fixed effects. Specifically, we tested for a significant condition by  
51 day interaction, since we hypothesized that there would be differences between groups on the CNO day but not  
52 on the baseline day. If a significant interaction was detected, post-hoc tests (adjusted for multiple comparisons)  
53 were used to confirm whether a significant increase or decrease was only present during the CNO day. With this  
54 approach, we could isolate the specific effects of SOM+ cell activation above and beyond the effects due to  
55 CNO injection alone (controls). The same statistical approach was used for SOM+ cell inhibition and PV+ cell  
56 activation experiments (see below).

57 First, we confirmed that CNO administration in SOM-Cre mice expressing hM3Dq drove activation of Fos -  
58 a marker of neuronal activity - in SOM+, hM3Dq+ neurons, indicating that the drug was able to activate its  
59 target cells in vivo (Figure 2A). Next, SOM-Cre mice previously injected with either hM3Dq AAV or non-  
60 hM3Dq AAV (n=6 mice/group) were administered CNO (5mg/kg) midway through the light phase, when most  
61 sleep pressure has dissipated. After CNO injection mice continued to cycle through sleep-wake states and  
62 NREM sleep was characterized by decreased muscle tone, slow waves in both frontal EEG and LFP signals,  
63 and OFF periods in MUA (Figure 2B,C), suggesting that qualitatively, physiological sleep continued following  
64 SOM+ cell activation. Quantitatively, relative to controls, SOM+ cell activation resulted in a sustained increase  
65 in NREM SWA in both the EEG ( $p < 3e-5$ ) and M2 LFP ( $p = 3.6e-10$ ) that lasted for the rest of the light cycle  
66 (Figure 2D). Further spectral analysis in M2 found a broad shift toward lower frequency activity during NREM  
67 sleep, with a significant increase in SWA, theta (6-8 Hz), and alpha (8-15 Hz) bands and a decrease in beta (15-  
68 30 Hz), low (30-60 Hz) and high (60-100 Hz) gamma bands (beta,  $p = 0.028$ ; alpha,  $p = 0.002$ ; all others  $p < 1e-$   
69  $8$  for Hrs 7-12; Figure 2E). There was no difference in spindle power between groups ( $p=0.93$ ; Suppl. Figure  
70 2B) and a significant decrease in spindle incidence ( $p = 2.9e-6$ ; Suppl. Figure 2C). Similar effects – increased  
71 SWA, alpha, theta and beta power and decreased low and high gamma power – were present in REM sleep ( $p <$   
72  $1e-7$ ; Figure 2E). In wake, SWA increased ( $p < 0.0005$ ) and high gamma decreased ( $p = 6.9e-6$ ; Figure 2E).  
73 Sleep architecture was also modulated by SOM+ cell activation, with a trend towards increased NREM sleep  
74 and a significant decrease in wake and REM sleep (Figure 2D).

75 To compare the effects of SOM+ cell activation to well-known procedures that lead to increased sleep  
76 pressure and SWA, we subjected the same SOM-Cre/AAV-hM3Dq animals to sleep deprivation through  
77 exploration of novel objects for 6 hours during the first half of the light phase, a period during which mice are  
78 normally asleep. Consistent with previous studies [32], we found that sleep deprivation led to an early (first  
79 hour of recovery) increase in SWA ( $p = 2e-16$ ), theta ( $p = 2e-16$ ), alpha ( $p = 2.2e-15$ ) and beta activity ( $p =$   
80  $0.007$ ) during NREM sleep and in theta activity during wake ( $p = 2.8e-6$ ), as well as to an increase in time spent  
81 in NREM sleep (Suppl. Figure 3A,B). Thus, the enhancement of slow frequencies after SOM+ cell activation  
82 resembles that induced by sleep deprivation. The incidence and slope of the slow waves – two additional, highly  
83 sensitive measures of sleep pressure [5] – also increased in M2 after both sleep deprivation and SOM+ cell  
84 activation (Suppl. Figure 3C-E). Moreover, analysis of laminar recordings in baseline, recovery NREM sleep,  
85 and NREM sleep following chemogenetic activation showed that in all cases slow waves were largest in the  
86 LFP recordings from deep layers and were accompanied by OFF periods across all layers (Suppl. Figure 3F),  
87 consistent with previous reports from NREM sleep [33]. Thus, like sleep deprivation, chemogenetic activation  
88 of SOM+ cells promotes the occurrence of slow waves that electrophysiologically resemble those in natural

39 NREM sleep and also increases their slope, a sign of enhanced neuronal synchrony [5]. Altogether, these results  
30 suggest that the stimulation of SOM+ cells may promote the same physiological mechanisms underlying sleep  
31 slow waves.

32 Other SOM-Cre mice were injected with the inhibitory receptor hM4Di (M4+, n=5 mice) or non-hM4Di  
33 AAV (M4-, controls, n=5 mice). After CNO, hM4Di+ mice did not differ from controls in the time spent awake  
34 or asleep. By contrast they showed, during NREM sleep, a persistent decrease in SWA (Figure 3A-D),  
35 associated with a decrease in the incidence of slow waves (N/min,  $33.4 \pm 2.0$  vs.  $29.9 \pm 2.7$ ,  $p = 0.01$ , mean  $\pm$   
36 sd) and during REM sleep, a broad decrease in power across most frequencies (Figure 3D).

37 Previous work has described a group of cortical neurons containing high levels of neuronal nitric oxide  
38 synthase - type I nNOS+ cells – that expresses Fos during early recovery sleep, when SWA is high [34]. We  
39 first confirmed this finding in 2 mice, in which we found that after 90 min of recovery sleep following 6 hours  
40 of sleep deprivation most nNOS+ cells were also Fos+ (61%), and were mainly located in deep layers, as  
41 previously reported [35] (data not shown). Since all type I nNOS+ cells are also SOM+ cells but not vice versa,  
42 [35] in other mice (n=6) we assessed Fos expression in SOM+ cells and found that only a small subset of  
43 SOM+ neurons were Fos+ during recovery sleep. Conversely, many Fos+ cells during recovery sleep were not  
44 SOM+ cells, and Fos+ cells were found in all cortical layers (Suppl. Figure 4). It should be noted that the mean  
45 firing rates of most cortical cells are only slightly decreased throughout sleep relative to wake and the  
46 relationship between spontaneous neuronal activity and Fos expression is not straightforward [36].

47 Is the induction of physiological slow waves and NREM sleep specific to SOM+ neurons? The most  
48 numerous population of cortical inhibitory cells are parvalbumin (PV) positive [30]. Using a PV-Cre line, we  
49 first confirmed that unlike SOM+ cells, PV+ neurons have local projections and their axons mostly avoid L1  
50 [21] (Figure 4A). Optogenetic stimulation of PV+ cells produced a more transient silencing in response to laser  
51 pulses than did optogenetic activation of SOM+ cells (Figure 4B; latency to first spike post-pulse, mean  $\pm$  sd;  
52 SOM+  $110 \pm 38$  ms; PV+  $50 \pm 15$  ms,  $p=0.007$ ; 7 SOM+ mice and 5 PV+ mice). Next, we confirmed that CNO  
53 induces Fos expression in PV+, hM3Dq+ neurons (Figure 4C), as it does in SOM+, hM3Dq+ cells. Relative to  
54 controls injected with non-hM3Dq+ AAV, chemogenetic activation of PV+ cells led to a marked decrease in  
55 M2 SWA during NREM sleep (Figure 4D-F, n=5 mice) as well as in all other major frequency bands (all  
56  $p<0.05$ ; Figure 4G). PV+ cell activation also increased the duration of behaviorally and polygraphically defined  
57 NREM sleep and decreased the duration of REM sleep (Figure 4F). Consistent with this broad power decline,  
58 during chemogenetic activation of PV+ cells cortical firing was profoundly suppressed during NREM sleep ( $54$   
59  $\pm 8\%$  decline in MUA, hours 8-12 post-CNO vs. hours 1-6 pre-CNO), much more than after activation of

20 SOM+ cells ( $27 \pm 6\%$  decline;  $p=0.0009$ ). In contrast, PV+ cell activation led to a broad increase in EEG power  
21 during REM sleep (from SWA to beta, all  $p<0.05$ ; Figure 4G) and during wake (from SWA to alpha, all  $p<0.05$ ;  
22 Figure 4G).

23 These findings show that slow waves – the hallmark of NREM sleep – are positively regulated by a  
24 population of SOM+ cortical inhibitory interneurons. SOM+ cells fire just before the occurrence of slow waves  
25 and their acute optogenetic activation produces a neuronal OFF period across putative excitatory and inhibitory  
26 neurons, consistent with the broad connectivity of SOM+ cells. Sustained chemogenetic activation of SOM+  
27 cells enhances SWA and the slope of individual slow waves, while their chemogenetic inhibition decreases  
28 SWA and slow wave incidence. In contrast, PV+ cell activation profoundly suppresses SWA and cortical  
29 activity in general, demonstrating that the positive role SOM+ cells in the generation of sleep slow waves is not  
30 shared by all GABAergic cortical interneurons.

31 Altogether, SOM+ cell activation increased sleep SWA, SOM+ inhibition decreased SWA, and PV+ cell  
32 activation nearly suppressed SWA. However, only PV+ cell activation led to a significant increase in NREM  
33 sleep duration. Previous studies [32, 37, 38] have also shown that changes in the “intensity” of NREM sleep, as  
34 reflected by SWA, can be dissociated from changes in its duration. For instance, several drugs and different  
35 regimes of sleep deprivation can affect either NREM sleep or slow waves, or change both but in opposite  
36 directions [32, 37]. Moreover, slow waves can change globally or locally in response to wake-induced changes  
37 in cortical activity and plasticity, often without any effect on NREM sleep duration [32, 37, 38].

38 It is possible that in addition to SOM+ cells, other inhibitory cell types play a role in the induction of slow  
39 waves. For example, neurogliaform cells can induce indiscriminate GABA<sub>B</sub>-mediated hyperpolarization  
40 through volume transmission [30, 39], although their effects on synaptic strength are less powerful than those of  
41 SOM+ cells [11]. The widespread L1 projections of Martinotti cells, which comprise ~70% of SOM+ cells,  
42 makes them a strong candidate for mediating the induction of sleep slow waves reported here, but definitive  
43 evidence will require repeating these experiments in Martinotti-specific Cre lines. Future experiments should  
44 establish the contribution of other cortical subpopulations of SOM+ cells [40], such as non-Martinotti cells in  
45 L4 [41], and other SOM+ cells outside the cortex, including the bistratified SOM+ cells in the hippocampus  
46 [42]. Moreover, SOM+ cells in the basal forebrain inhibit all types of neighboring wake-promoting neurons and  
47 their optogenetic activation slightly increases NREM sleep, consistent with the finding that a minority of these  
48 cells is more active during NREM sleep [43]. Another question is how the activity and excitability of SOM+  
49 cells is controlled by subcortical wake and sleep promoting systems, either directly or through other cortical cell  
50 types. SOM+ cells are inhibited by cortical VIP interneurons [44] that fire during locomotion and are



51 themselves under the control of arousal systems [45] and by PV+ interneurons in the basal forebrain, which are  
52 wake-on and promote wake [43]. Also, noradrenaline, a neuromodulator that is released at high levels in wake  
53 and low levels in sleep, reduces the effectiveness of synapses between SOM+ and pyramidal cells [46] and the  
54 conductivity of gap junctions [47], possibly preventing the induction and synchronization of sleep slow waves.  
55 Finally, an open question is whether the role of SOM+ cells in promoting SWA may be related to their  
56 suggested role in the maturation of cortical circuits and in synaptic plasticity [48].

57 **Acknowledgements.** Funded by NIMH grant R01MH099231 to CC and GT, NINDS grant P01NS083514 to  
58 CC and GT, R01GM116916 to GT, Wisconsin Distinguished Rath Graduate Fellowship to CMF, NIGMS T32  
59 GM008962 to CMF. CNO was obtained from NINDS as part of the Rapid Access to Investigative Drug  
60 Program.

61  
62 **Competing financial interests.** GT is involved in a research study in humans supported by Philips  
63 Respirationics. This study is not related to the work presented in the current manuscript. The other authors have  
64 indicated no financial conflicts of interest. Correspondence and requests for materials should be addressed to  
65 CC ([ccirelli@wisc.edu](mailto:ccirelli@wisc.edu)) or GT ([gtononi@wisc.edu](mailto:gtononi@wisc.edu)).

66

67

58 **CAPTIONS TO FIGURES**

59  
60  
61 **Figure 1. Firing of SOM+ cells is locked to slow waves and triggers OFF periods during sleep. A,**  
62 Clustering results for one well-isolated unit, in green, tagged by ChR2 stimulation (putative SOM+). Yellow  
63 bars indicate the time of laser stimulation (20 msec). **B,** Raw LFP and activity from the same unit; **C,** Mean  
64 firing rates (light period) of the 3 tagged units; AW, QW, active, quiet wake. **D,** Mean firing rates in recovery  
65 sleep (RS) after sleep deprivation compared to early and late NREM sleep during baseline (E,L). **E,** Correlation  
66 between unit firing and SWA in baseline sleep (NR) and recovery sleep after SD (RS). **F,** Firing is locked to  
67 local slow waves and increases significantly (above red line) before their onset (0 msec, defined by the zero  
68 crossing of each slow wave, see Methods; firing normalized for mean in NREM, red line is 99<sup>th</sup> percentile FR  
69 for simulated spike trains with shuffled ISIs). **G,** Left, example of MUA changes in one responding (SOM+,  
70 green) channel and several SOM- channels after laser stimulation (yellow bar, 50 msec); right, mean MUA  
71 changes for all SOM+ and SOM- channels (7 mice). Inset, expanded Y axis to show the firing of SOM+  
72 channels after laser pulse. **H,** Left, change in firing in one broad unit (putative excitatory, spike waveform  
73 shown on top); right, mean of all broad units. **I,** as in **H** for narrow (putative inhibitory) units.

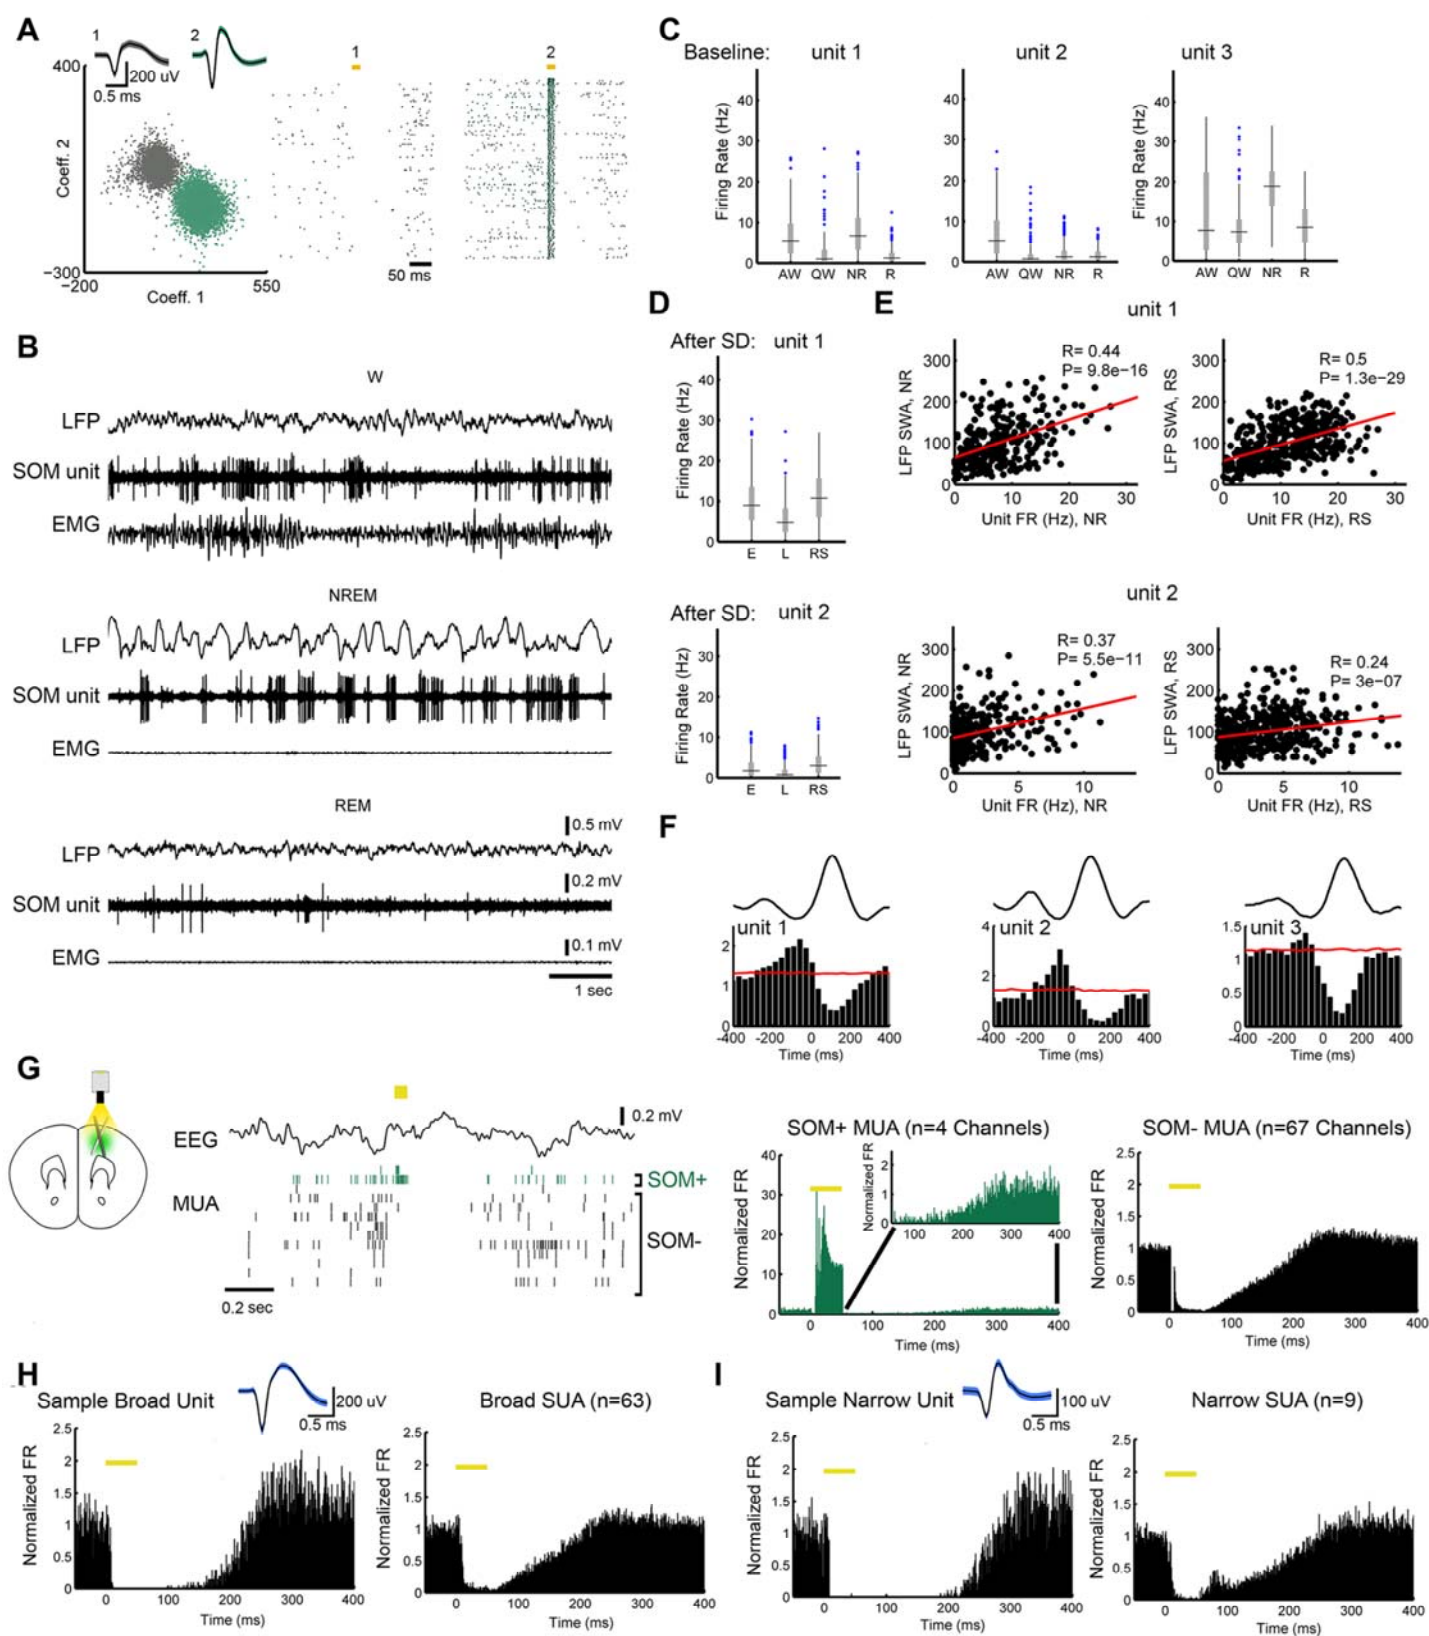

33

34

35 **Figure 2. Chemogenetic SOM+ cell activation leads to a sustained increase in SWA. A,** Fos induction in  
36 SOM+, hM3Dq+ neurons after CNO. **B,** Effects on sleep and SWA (NREM sleep EEG power, 0.5-4.5 Hz, M2)  
37 in one representative SOM-Cre hM3Dq+ mouse given CNO (5 mg/kg i.p) in the middle of the light phase.  
38 Hypnograms and spectra shown for entire light period (12hrs). **C,** Raw traces from the same animal on baseline  
39 and post-CNO. **D,** Sleep/wake and SWA percentages in baseline (B) and after CNO in mice expressing hM3Dq  
40 AAV (M3+, 6 mice) and mice expressing non-hM3Dq AAV (controls, M3-, 6 mice). For each parameter the  
41 left panel shows the hour-by-hour data, which were used to run the LME models, locked to first sleep bout after  
42 the start of the light period and after midpoint of the light period (when CNO was given); if a significant  
43 condition (group) by day interaction was found, post-hoc tests were run to isolate the main effect of CNO (right  
44 panel). \*, p<0.05; \*\*, p<0.01; \*\*\*, p<0.001. **E,** Power spectra for the second half of the light period in each  
45 vigilance state.

36

37

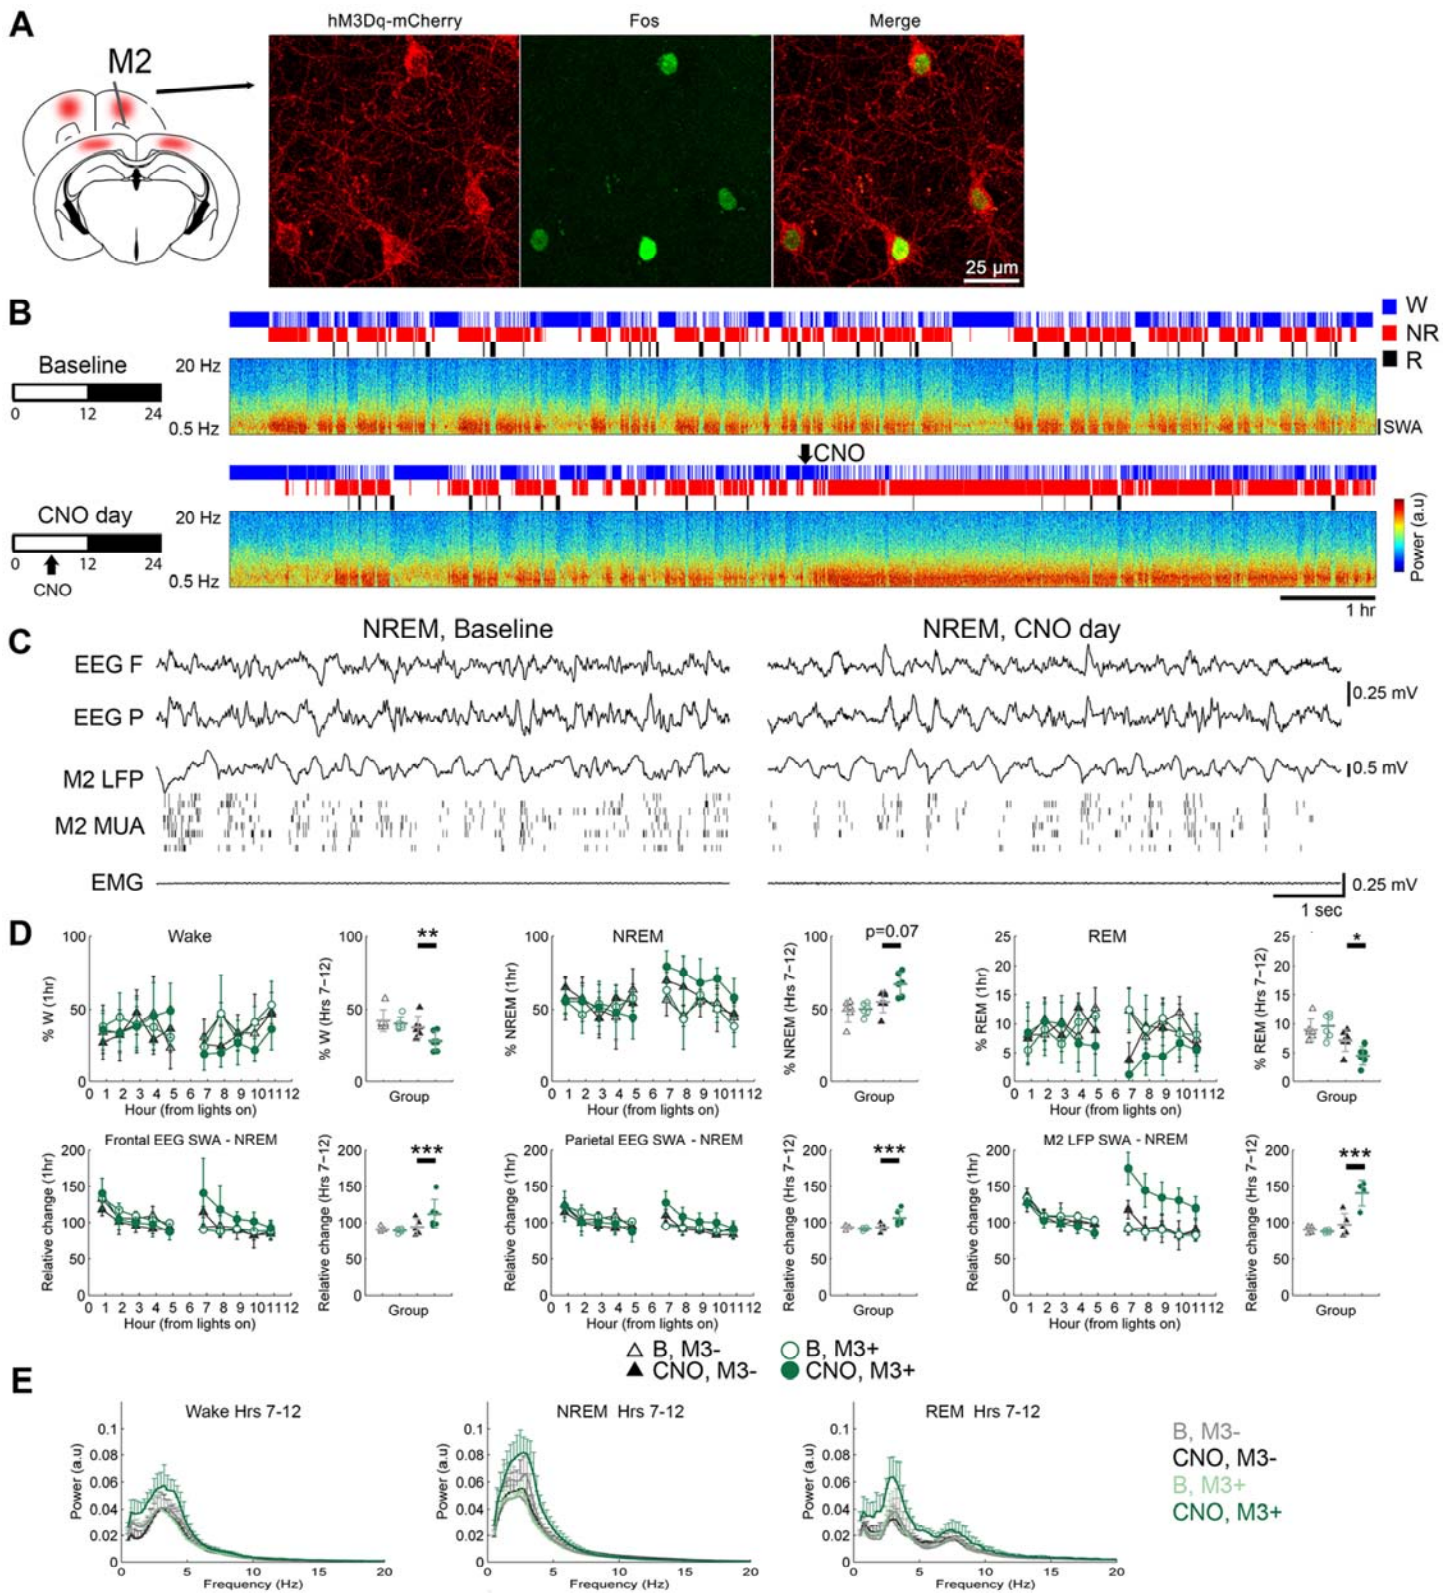

**Figure 3. Chemogenetic inactivation of SOM+ cells leads to a sustained decrease in SWA. A-B,** Effects on sleep and SWA in M2 during the light period in one representative SOM-Cre hM4Di+ mouse given CNO (10

38  
39  
40

mg/kg i.p.) at light onset, and raw traces from the same animal in the second hour post-injection. **C**, Effects on SWA and behavioral states after CNO (M4+, 5 mice; controls, M4- 5 mice). For each parameter the left panel shows hour-by-hour data locked to the first sleep bout after the start of the light period (when CNO was given), while the right panel shows the mean values from the first half of the light period. LME models were run on hour-by-hour data; if a significant condition (group) by day interaction was found, post-hoc tests were run to isolate the main effect of CNO (right panel). \*\*,  $p < 0.01$ ; \*\*\*,  $p < 0.001$ . **D**, Power spectra for the first half of the light period in each vigilance state.

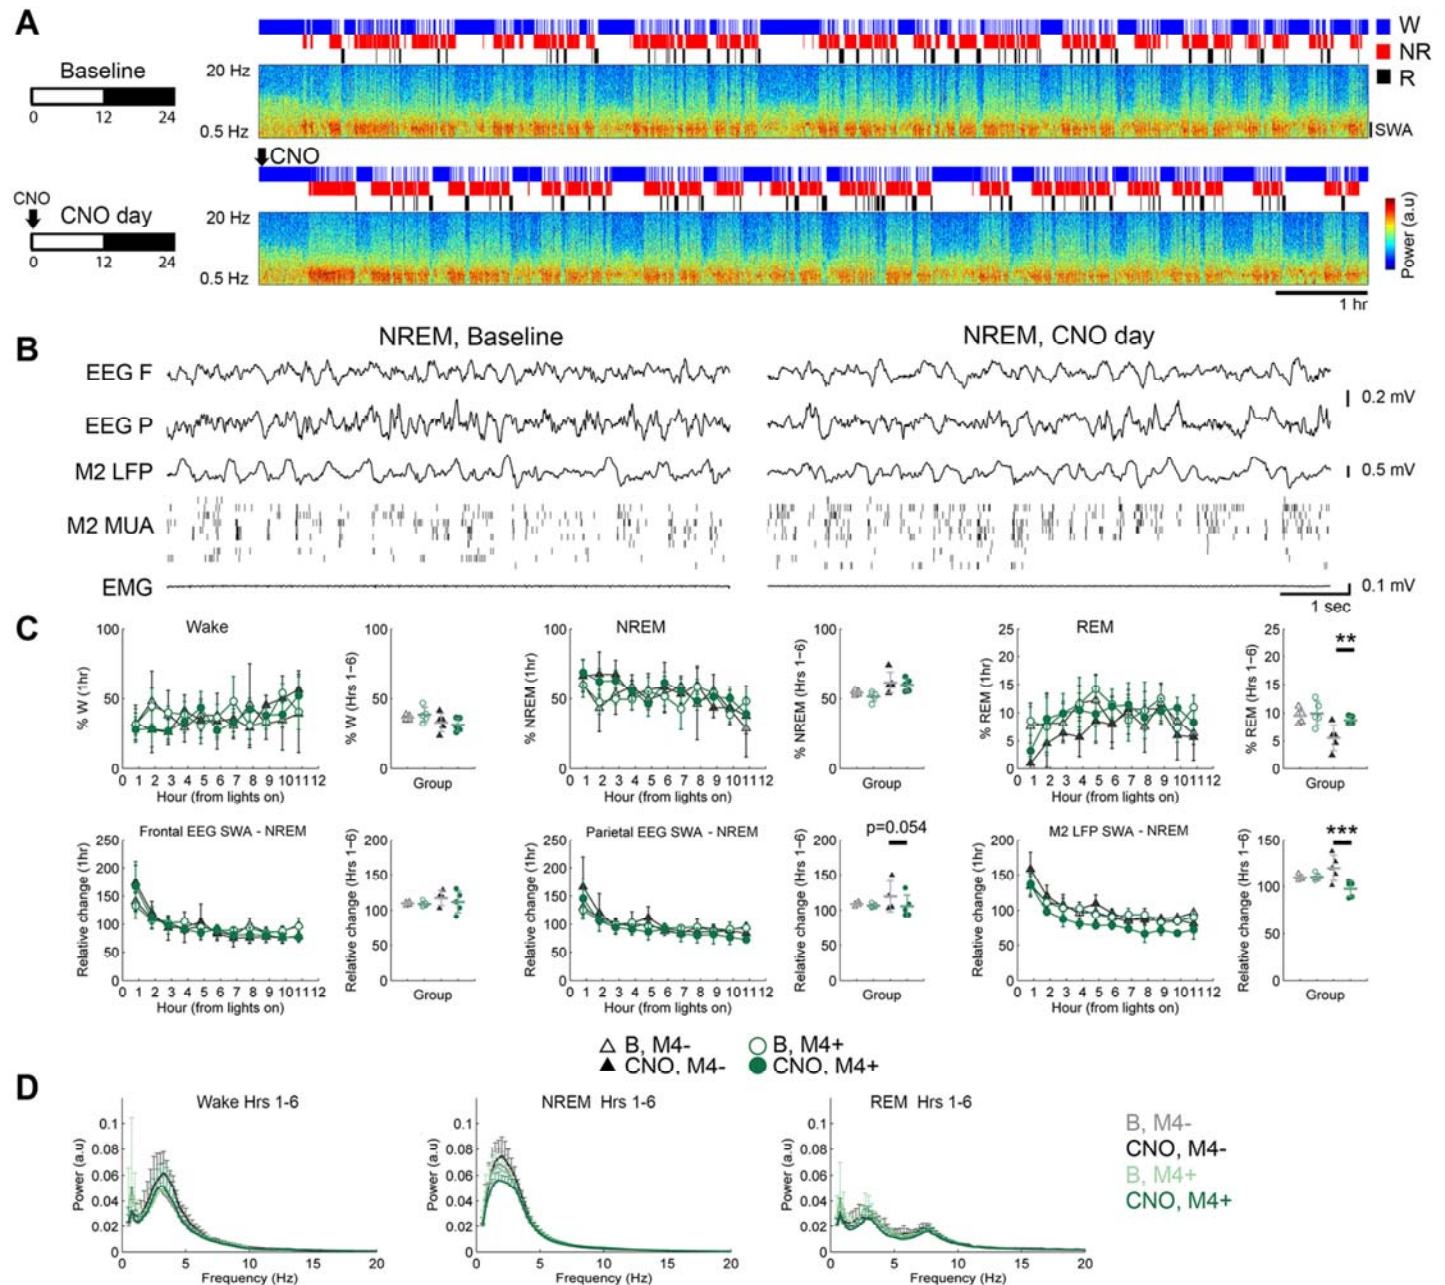

**Figure 4. PV activation decreases SWA.** **A**, Cortical projections shown in sagittal and coronal sections from a representative PV-Cre mouse injected with AAV1.CAG.Flex.eGFP.WPRE.bGH, with sparse innervation in

15 layer 1. **B**, Optogenetic stimulation of PV+ cells leads to transient suppression of MUA (5 mice). **C**, Fos  
16 induction after CNO. **D,E**, Increase in NREM sleep percentage but decrease in M2 SWA following CNO in one  
17 representative mouse given CNO (5 mg/kg i.p) in the middle of the day, and raw traces from the same animal  
18 during the second hour post-injection. **B**, baseline. **F**, Effects on SWA and behavioral states (M3+, 5 mice,  
19 controls, M3- 3 mice). For each parameter the left panel shows hour-by-hour data, which were used to run the  
20 LME models, locked to the first sleep bout after the start of the light period and after midpoint of the light  
21 period (when CNO was given); if a significant condition (group) by day interaction was found, post-hoc tests  
22 were run to isolate the main effect of CNO (right panel). \*,  $P < 0.05$ ; \*\*,  $p < 0.01$ ; \*\*\*,  $p < 0.001$ . **G**, Power spectra  
23 for the second half of the light period in each vigilance state.

24

25

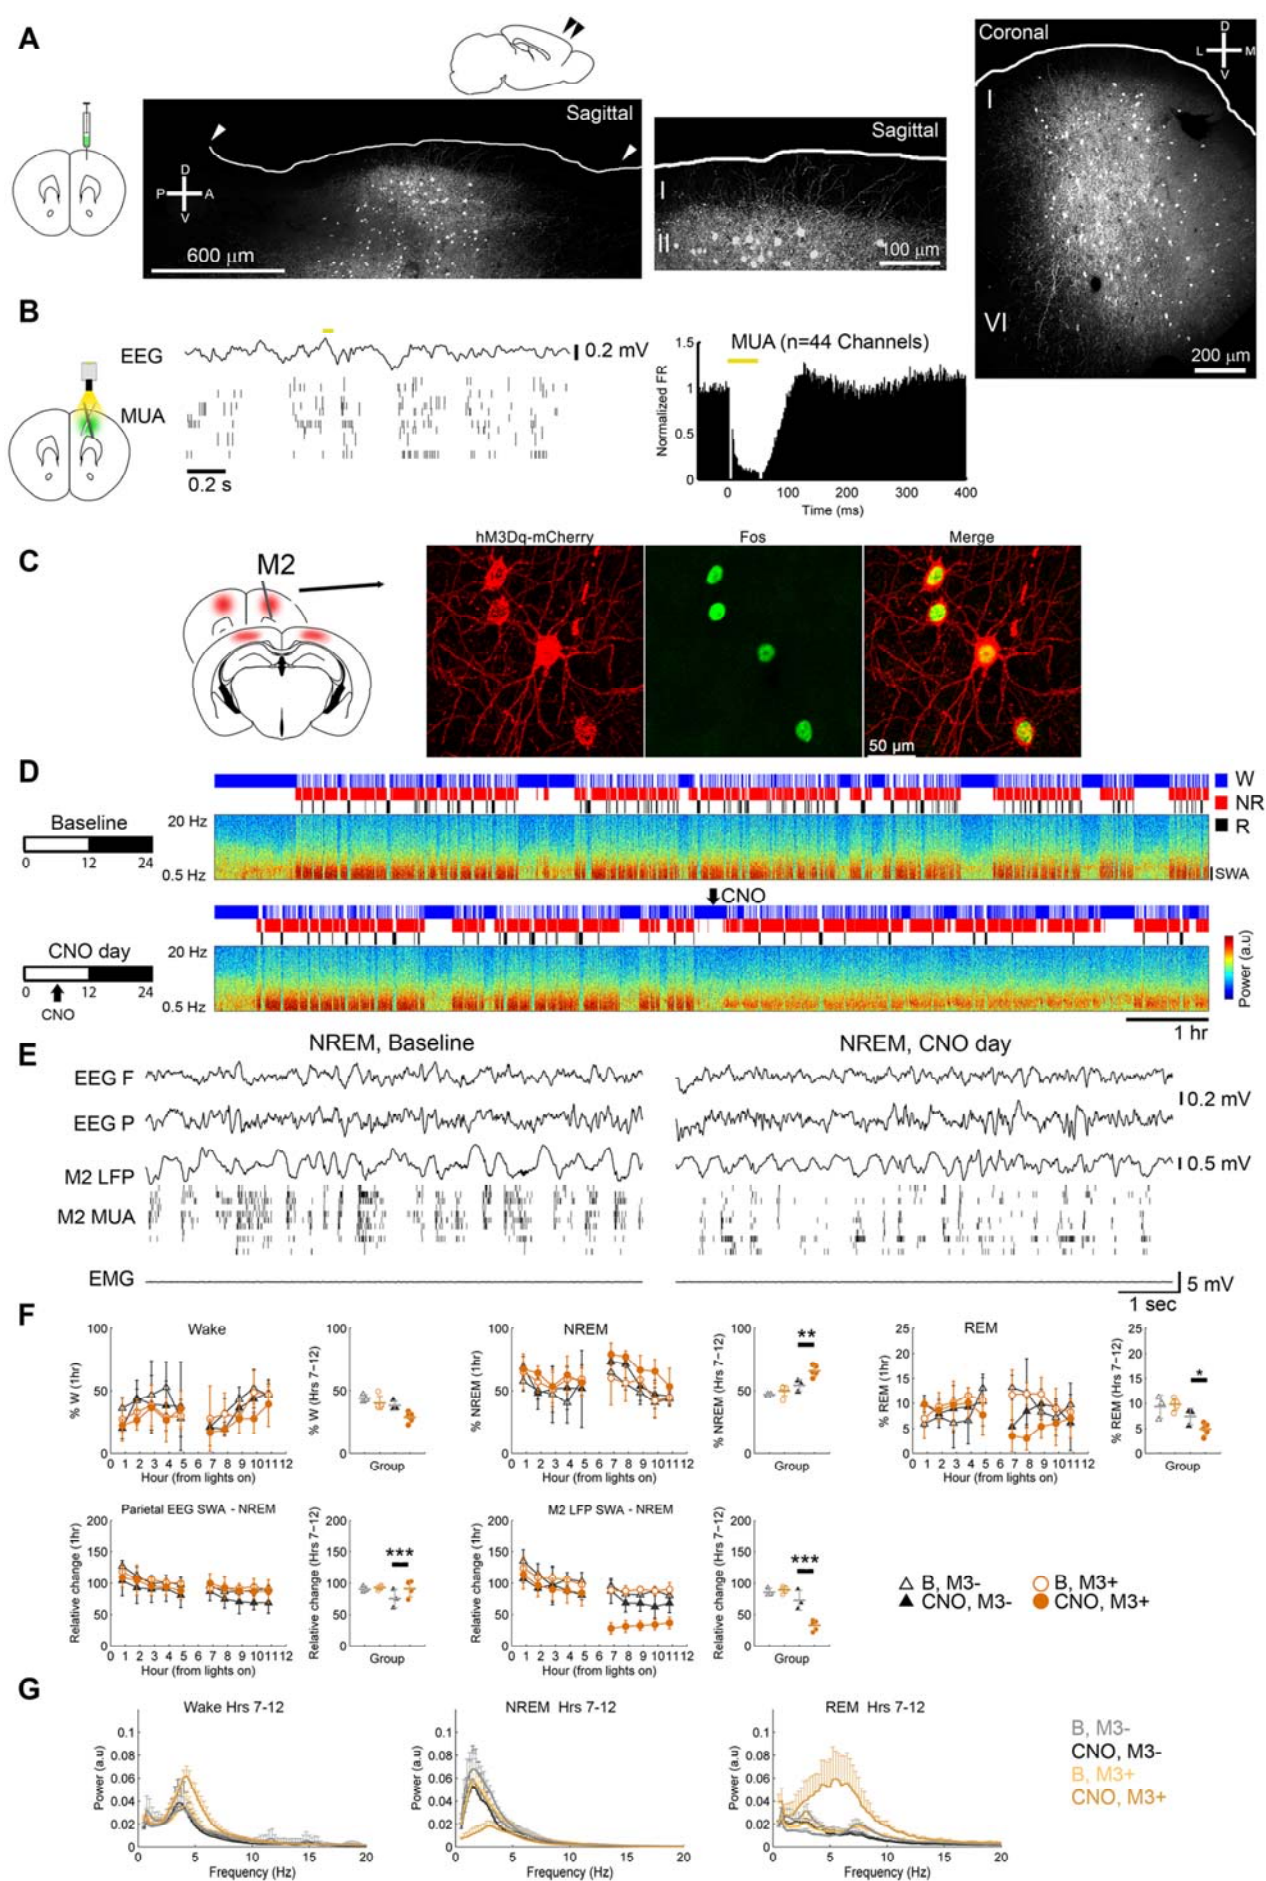



## REFERENCES

1. Steriade, M. (2000). Corticothalamic resonance, states of vigilance and mentation. *Neuroscience* *101*, 243-276.
2. Neske, G.T., Patrick, S.L., and Connors, B.W. (2015). Contributions of diverse excitatory and inhibitory neurons to recurrent network activity in cerebral cortex. *The Journal of neuroscience : the official journal of the Society for Neuroscience* *35*, 1089-1105.
3. Crunelli, V., David, F., Lorincz, M.L., and Hughes, S.W. (2015). The thalamocortical network as a single slow wave-generating unit. *Curr Opin Neurobiol* *31*, 72-80.
4. Volgushev, M., Chauvette, S., Mukovski, M., and Timofeev, I. (2006). Precise long-range synchronization of activity and silence in neocortical neurons during slow-wave oscillations [corrected]. *The Journal of neuroscience : the official journal of the Society for Neuroscience* *26*, 5665-5672.
5. Vyazovskiy, V.V., Olcese, U., Lazimy, Y.M., Faraguna, U., Esser, S.K., Williams, J.C., Cirelli, C., and Tononi, G. (2009). Cortical firing and sleep homeostasis. *Neuron* *63*, 865-878.
6. Massimini, M., Ferrarelli, F., Esser, S.K., Riedner, B.A., Huber, R., Murphy, M.J., Peterson, M.J., and Tononi, G. (2007). Triggering sleep slow waves by transcranial magnetic stimulation. *Proceedings of the National Academy of Sciences of the United States of America* *104*, 8496-8501.
7. Lemieux, M., Chauvette, S., and Timofeev, I. (2015). Neocortical inhibitory activities and long-range afferents contribute to the synchronous onset of silent states of the neocortical slow oscillation. *Journal of neurophysiology* *113*, 768-779.
8. Craig, M.T., Mayne, E.W., Bettler, B., Paulsen, O., and McBain, C.J. (2013). Distinct roles of GABAB1a- and GABAB1b-containing GABAB receptors in spontaneous and evoked termination of persistent cortical activity. *J Physiol* *591*, 835-843.
9. Markov, N.T., Vezoli, J., Chameau, P., Falchier, A., Quilodran, R., Huissoud, C., Lamy, C., Misery, P., Giroud, P., Ullman, S., et al. (2014). Anatomy of hierarchy: feedforward and feedback pathways in macaque visual cortex. *J Comp Neurol* *522*, 225-259.
10. Cauller, L. (1995). Layer I of primary sensory neocortex: where top-down converges upon bottom-up. *Behav Brain Res* *71*, 163-170.
11. Urban-Ciecko, J., Fanselow, E.E., and Barth, A.L. (2015). Neocortical somatostatin neurons reversibly silence excitatory transmission via GABA<sub>B</sub> receptors. *Curr Biol* *25*, 722-731.
12. Silberberg, G., and Markram, H. (2007). Disynaptic inhibition between neocortical pyramidal cells mediated by Martinotti cells. *Neuron* *53*, 735-746.
13. Chiu, C.Q., Lur, G., Morse, T.M., Carnevale, N.T., Ellis-Davies, G.C., and Higley, M.J. (2013). Compartmentalization of GABAergic inhibition by dendritic spines. *Science* *340*, 759-762.
14. Craig, M.T., and McBain, C.J. (2014). The emerging role of GABAB receptors as regulators of network dynamics: fast actions from a 'slow' receptor? *Curr Opin Neurobiol* *26*, 15-21.
15. Wang, Y., Neubauer, F.B., Luscher, H.R., and Thurley, K. (2010). GABAB receptor-dependent modulation of network activity in the rat prefrontal cortex in vitro. *The European journal of neuroscience* *31*, 1582-1594.
16. Fino, E., and Yuste, R. (2011). Dense inhibitory connectivity in neocortex. *Neuron* *69*, 1188-1203.
17. Lee, C.K., and Huguenard, J.R. (2011). Martinotti cells: community organizers. *Neuron* *69*, 1042-1045.
18. Kapfer, C., Glickfeld, L.L., Atallah, B.V., and Scanziani, M. (2007). Supralinear increase of recurrent inhibition during sparse activity in the somatosensory cortex. *Nature neuroscience* *10*, 743-753.
19. Fanselow, E.E., Richardson, K.A., and Connors, B.W. (2008). Selective, State-Dependent Activation of Somatostatin-Expressing Inhibitory Interneurons in Mouse Neocortex, Volume 100.
20. Fanselow, E.E., and Connors, B.W. (2010). The roles of somatostatin-expressing (GIN) and fast-spiking inhibitory interneurons in UP-DOWN states of mouse neocortex. *Journal of neurophysiology* *104*, 596-606.
21. Jiang, X., Shen, S., Cadwell, C.R., Berens, P., Sinz, F., Ecker, A.S., Patel, S., and Tolias, A.S. (2015). Principles of connectivity among morphologically defined cell types in adult neocortex. *Science* *350*, aac9462.
22. Krishnamurthy, P., Silberberg, G., and Lansner, A. (2012). A cortical attractor network with Martinotti cells driven by facilitating synapses. *PloS one* *7*, e30752.

- 76 23. Wang, Y., Toledo-Rodriguez, M., Gupta, A., Wu, C., Silberberg, G., Luo, J., and Markram, H. (2004).  
77 Anatomical, physiological and molecular properties of Martinotti cells in the somatosensory cortex of the juvenile  
78 rat. *J Physiol* *561*, 65-90.
- 79 24. Ma, Y., Hu, H., Berrebi, A.S., Mathers, P.H., and Agmon, A. (2006). Distinct subtypes of somatostatin-containing  
30 neocortical interneurons revealed in transgenic mice. *The Journal of neuroscience : the official journal of the*  
31 *Society for Neuroscience* *26*, 5069-5082.
- 32 25. Massimini, M., Huber, R., Ferrarelli, F., Hill, S.L., and Tononi, G. (2004). The sleep slow oscillation as a  
33 traveling wave. *The Journal of neuroscience : the official journal of the Society for Neuroscience* *24*, 6862-6870.
- 34 26. Urban-Ciecko, J., and Barth, A.L. (2016). Somatostatin-expressing neurons in cortical networks. *Nat Rev*  
35 *Neurosci* *17*, 401-409.
- 36 27. Taniguchi, H., He, M., Wu, P., Kim, S., Paik, R., Sugino, K., Kvitsiani, D., Fu, Y., Lu, J., Lin, Y., et al. (2011). A  
37 resource of Cre driver lines for genetic targeting of GABAergic neurons in cerebral cortex. *Neuron* *71*, 995-1013.
- 38 28. Pinto, L., and Dan, Y. (2015). Cell-Type-Specific Activity in Prefrontal Cortex during Goal-Directed Behavior.  
39 *Neuron* *87*, 437-450.
- 30 29. Gentet, L.J., Kremer, Y., Taniguchi, H., Huang, Z.J., Staiger, J.F., and Petersen, C.C. (2012). Unique functional  
31 properties of somatostatin-expressing GABAergic neurons in mouse barrel cortex. *Nature neuroscience* *15*, 607-  
32 612.
- 33 30. Tremblay, R., Lee, S., and Rudy, B. (2016). GABAergic Interneurons in the Neocortex: From Cellular Properties  
34 to Circuits. *Neuron* *91*, 260-292.
- 35 31. Hill, S., and Tononi, G. (2005). Modeling sleep and wakefulness in the thalamocortical system. *Journal of*  
36 *neurophysiology* *93*, 1671-1698.
- 37 32. Borbely, A.A., and Achermann, P. (2005). Sleep homeostasis and models of sleep regulation. In *Principles and*  
38 *Practice of Sleep Medicine.*, Fourth edition Edition, M.H. Kryer, T. Roth and W.C. Dement, eds. (Elsevier), pp.  
39 405-417.
- 30 33. Funk, C.M., Honjoh, S., Rodriguez, A.V., Cirelli, C., and Tononi, G. (2016). Local Slow Waves in Superficial  
31 Layers of Primary Cortical Areas during REM Sleep. *Curr Biol* *26*, 396-403.
- 32 34. Gerashchenko, D., Wisor, J.P., Burns, D., Reh, R.K., Shiromani, P.J., Sakurai, T., de la Iglesia, H.O., and Kilduff,  
33 T.S. (2008). Identification of a population of sleep-active cerebral cortex neurons. *Proceedings of the National*  
34 *Academy of Sciences of the United States of America* *105*, 10227-10232.
- 35 35. Kilduff, T.S., Cauli, B., and Gerashchenko, D. (2011). Activation of cortical interneurons during sleep: an  
36 anatomical link to homeostatic sleep regulation? *Trends Neurosci* *34*, 10-19.
- 37 36. Kawashima, T., Okuno, H., and Bito, H. (2014). A new era for functional labeling of neurons: activity-dependent  
38 promoters have come of age. *Front Neural Circuits* *8*, 37.
- 39 37. Davis, C.J., Clinton, J.M., Jewett, K.A., Zielinski, M.R., and Krueger, J.M. (2011). Delta wave power: an  
10 independent sleep phenotype or epiphenomenon? *J Clin Sleep Med* *7*, S16-18.
- 11 38. Krueger, J.M., and Tononi, G. (2011). Local use-dependent sleep; synthesis of the new paradigm. *Current topics*  
12 *in medicinal chemistry* *11*, 2490-2492.
- 13 39. Olah, S., Fule, M., Komlosi, G., Varga, C., Baldi, R., Barzo, P., and Tamas, G. (2009). Regulation of cortical  
14 microcircuits by unitary GABA-mediated volume transmission. *Nature* *461*, 1278-1281.
- 15 40. McGarry, L.M., Packer, A.M., Fino, E., Nikolenko, V., Sippy, T., and Yuste, R. (2010). Quantitative  
16 classification of somatostatin-positive neocortical interneurons identifies three interneuron subtypes. *Front Neural*  
17 *Circuits* *4*, 12.
- 18 41. Xu, H., Jeong, H.Y., Tremblay, R., and Rudy, B. (2013). Neocortical somatostatin-expressing GABAergic  
19 interneurons disinhibit the thalamorecipient layer 4. *Neuron* *77*, 155-167.
- 20 42. Katona, L., Lapray, D., Viney, T.J., Oulhaj, A., Borhegyi, Z., Micklem, B.R., Klausberger, T., and Somogyi, P.  
21 (2014). Sleep and movement differentiates actions of two types of somatostatin-expressing GABAergic  
22 interneuron in rat hippocampus. *Neuron* *82*, 872-886.
- 23 43. Xu, M., Chung, S., Zhang, S., Zhong, P., Ma, C., Chang, W.C., Weissbourd, B., Sakai, N., Luo, L., Nishino, S., et  
24 al. (2015). Basal forebrain circuit for sleep-wake control. *Nature neuroscience* *18*, 1641-1647.
- 25 44. Pfeiffer, C.K., Xue, M., He, M., Huang, Z.J., and Scanziani, M. (2013). Inhibition of inhibition in visual cortex:  
26 the logic of connections between molecularly distinct interneurons. *Nature neuroscience* *16*, 1068-1076.
- 27 45. Stryker, M.P. (2015). A Neural Circuit That Controls Cortical State, Plasticity, and the Gain of Sensory  
28 Responses in Mouse. *Cold Spring Harb Symp Quant Biol*.

- 29 46. Koyanagi, Y., Yamamoto, K., Oi, Y., Koshikawa, N., and Kobayashi, M. (2010). Presynaptic interneuron  
30 subtype- and age-dependent modulation of GABAergic synaptic transmission by beta-adrenoceptors in rat insular  
31 cortex. *Journal of neurophysiology* *103*, 2876-2888.
- 32 47. Zsiros, V., and Maccaferri, G. (2008). Noradrenergic modulation of electrical coupling in GABAergic networks  
33 of the hippocampus. *The Journal of neuroscience : the official journal of the Society for Neuroscience* *28*, 1804-  
34 1815.
- 35 48. Chen, S.X., Kim, A.N., Peters, A.J., and Komiyama, T. (2015). Subtype-specific plasticity of inhibitory circuits in  
36 motor cortex during motor learning. *Nature neuroscience* *18*, 1109-1115.

37
